# Supplementary material for: Religiosity in patients with amyotrophic lateral sclerosis, a cross-country comparison
Source: Springer Nature journal article supplement (doi:10.1007/s11136-023-03383-4), 2023-03-16
Supplement: MOESM2 [file 24635574]

*Religiosity in patients with amyotrophic lateral sclerosis, a cross-country comparison.*

*Ciećwierska et al., Quality of Life Research, 2023*

**Supplementary Materials Part B.**

**Detailed statistics for 2x2 ANOVAs reported in Table 1.**

For each of the dependent variables ANOVA/GLM results are presented, including the significance of Country, Diagnosis, and interaction effects. For significant interactions, the results of post-hoc test performed within each country group are reported.

*Age*

|           | <i>SS</i> | <i>df</i> | <i>MS</i> | <i>F</i> | <i>p</i> |
|-----------|-----------|-----------|-----------|----------|----------|
| Country   | 303.194   | 1         | 303.194   | 2.513    | 0.114    |
| Diagnosis | 178.619   | 1         | 178.619   | 1.48     | 0.224    |
| Country * |           |           |           |          |          |
| Diagnosis | 194.447   | 1         | 194.447   | 1.612    | 0.205    |
| Error     | 53571.74  | 444       | 120.657   |          |          |

*Education*

|           | <i>SS</i> | <i>df</i> | <i>MS</i> | <i>F</i> | <i>p</i> |
|-----------|-----------|-----------|-----------|----------|----------|
| Country   | 74.882    | 1         | 74.882    | 7.646    | 0.006    |
| Diagnosis | 5.912     | 1         | 5.912     | 0.604    | 0.438    |
| Country * | 6.211     | 1         | 6.211     | 0.634    | 0.426    |
| Diagnosis |           |           |           |          |          |
| Error     | 4250.674  | 434       | 9.794     |          |          |

*ACSA*

|           | <i>SS</i> | <i>df</i> | <i>MS</i> | <i>F</i> | <i>p</i> |
|-----------|-----------|-----------|-----------|----------|----------|
| Country   | 0.258     | 1         | 0.258     | 0.052    | 0.819    |
| Diagnosis | 247.573   | 1         | 247.573   | 50.357   | 0.000    |
| Country * | 2.142     | 1         | 2.142     | 0.436    | 0.510    |
| Diagnosis |           |           |           |          |          |
| Error     | 2163.214  | 440       | 4.916     |          |          |

*Pain frequency*

|           | <i>SS</i> | <i>df</i> | <i>MS</i> | <i>F</i> | <i>p</i> |
|-----------|-----------|-----------|-----------|----------|----------|
| Country   | 27.112    | 1         | 27.112    | 6.978    | 0.009    |
| Diagnosis | 0.524     | 1         | 0.524     | 0.135    | 0.714    |
| Country * | 18.641    | 1         | 18.641    | 4.798    | 0.029    |
| Diagnosis |           |           |           |          |          |
| Error     | 1616.207  | 416       | 3.885     |          |          |

| Post-hoc comparisons |         |         |                 | Bootstrap |       |       |
|----------------------|---------|---------|-----------------|-----------|-------|-------|
| Country              | Group 1 | Group 2 | Mean Difference | Bias      | SE    | p     |
| Germany              | ALS     | CON     | 0.494           | 0.004     | 0.253 | 0.054 |
| Poland               | ALS     | CON     | -0.352          | 0.008     | 0.289 | 0.237 |

*Pain intensity*

|           | <i>SS</i> | <i>df</i> | <i>MS</i> | <i>F</i> | <i>p</i> |
|-----------|-----------|-----------|-----------|----------|----------|
| Country   | 1.114     | 1         | 1.114     | 0.83     | 0.363    |
| Diagnosis | 7.392     | 1         | 7.392     | 5.508    | 0.019    |
| Country * | 3.766     | 1         | 3.766     | 2.806    | 0.095    |
| Diagnosis |           |           |           |          |          |
| Error     | 556.957   | 415       | 1.342     |          |          |

*Depression (ADI)*

|           | <i>SS</i> | <i>df</i> | <i>MS</i> | <i>F</i> | <i>p</i> |
|-----------|-----------|-----------|-----------|----------|----------|
| Country   | 995.85    | 1         | 995.85    | 33.992   | 0.000    |
| Diagnosis | 1421.9    | 1         | 1421.9    | 48.535   | 0.000    |
| Country * | 559.757   | 1         | 559.757   | 19.107   | 0.000    |
| Diagnosis |           |           |           |          |          |
| Error     | 12714.718 | 434       | 29.297    |          |          |

| Post-hoc comparisons |         |         |                 | Bootstrap |       |       |
|----------------------|---------|---------|-----------------|-----------|-------|-------|
| Country              | Group 1 | Group 2 | Mean Difference | Bias      | SE    | p     |
| Germany              | ALS     | CON     | 5.91            | -0.039    | 0.732 | 0.001 |
| Poland               | ALS     | CON     | 1.353           | -0.017    | 0.685 | 0.050 |

*Public religiosity*

|           | <i>SS</i> | <i>df</i> | <i>MS</i> | <i>F</i> | <i>p</i> |
|-----------|-----------|-----------|-----------|----------|----------|
| Country   | 127.89    | 1         | 127.89    | 29.836   | 0.000    |
| Diagnosis | 0.402     | 1         | 0.402     | 0.094    | 0.760    |
| Country * | 5.478     | 1         | 5.478     | 1.278    | 0.259    |
| Diagnosis |           |           |           |          |          |
| Error     | 1903.199  | 444       | 4.286     |          |          |

*Private religiosity*

|           | <i>SS</i> | <i>df</i> | <i>MS</i> | <i>F</i> | <i>p</i> |
|-----------|-----------|-----------|-----------|----------|----------|
| Country   | 103.367   | 1         | 103.367   | 43.339   | 0.000    |
| Diagnosis | 18.463    | 1         | 18.463    | 7.741    | 0.006    |
| Country * | 12.398    | 1         | 12.398    | 5.198    | 0.023    |
| Diagnosis |           |           |           |          |          |
| Error     | 1058.966  | 444       | 2.385     |          |          |

| Post-hoc comparisons |         |         |                 | Bootstrap |       |       |
|----------------------|---------|---------|-----------------|-----------|-------|-------|
| Country              | Group 1 | Group 2 | Mean Difference | Bias      | SE    | p     |
| Germany              | ALS     | CON     | 0.745           | 0.003     | 0.207 | 0.002 |
| Poland               | ALS     | CON     | 0.074           | 0.004     | 0.195 | 0.694 |

*Total religiosity*

|           | <i>SS</i> | <i>df</i> | <i>MS</i> | <i>F</i> | <i>p</i> |
|-----------|-----------|-----------|-----------|----------|----------|
| Country   | 461.21    | 1         | 461.21    | 41.675   | 0.000    |
| Diagnosis | 24.311    | 1         | 24.311    | 2.197    | 0.139    |
| Country * |           |           |           |          |          |
| Diagnosis | 34.358    | 1         | 34.358    | 3.105    | 0.079    |
| Error     | 4913.661  | 444       | 11.067    |          |          |

*Gender*

GLM - omnibus Test against the null model.

| Likelihood Ratio Chi-Square | <i>df</i> | <i>p</i> |
|-----------------------------|-----------|----------|
| 1.584                       | 3         | 0.663    |

| Tests of Model Effects | <i>Wald Chi-Square</i> | <i>df</i> | <i>p</i> |
|------------------------|------------------------|-----------|----------|
| Country                | 0.225                  | 1         | 0.636    |
| Diagnosis              | 1.376                  | 1         | 0.241    |
| Country * Diagnosis    | 0.028                  | 1         | 0.866    |
